# Supplementary material
Source: Springer Nature journal article supplement (https://www.springermedizin.de/resource/supplementary/12890_2011_322_MOESM1_ESM.pdf/9504954)

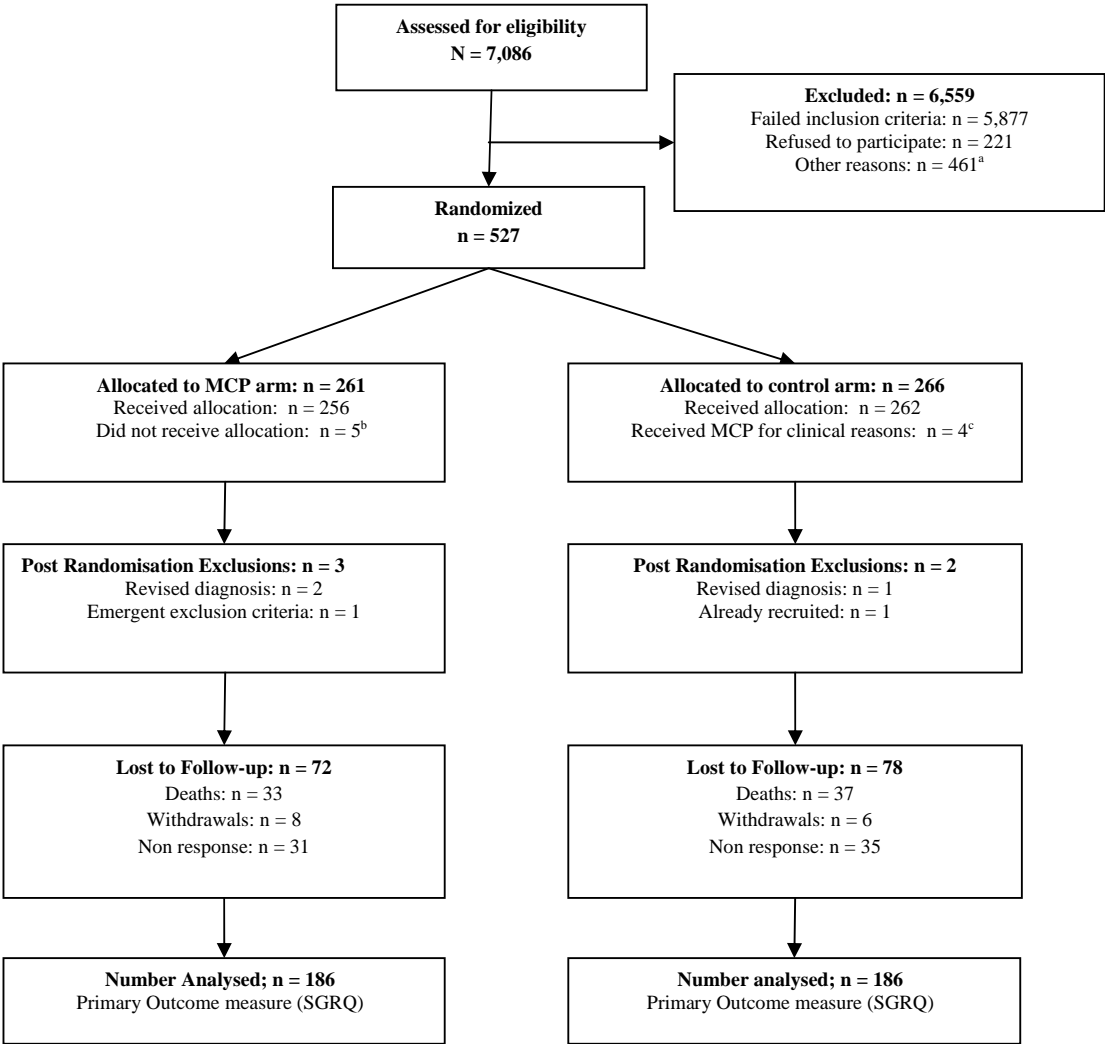

Supplement: MOESM1 [file 9504954]
